# Supplementary material for: NetREx: Network-based Rice Expression Analysis Server for abiotic stress conditions
Source: Oxford University Press journal article supplement (doi:10.1093/database/baac060), 2022-01-01
Supplement: baac060_supp.zip [file baac060_supp.zip]

NetREx

| Gene ID      | Name      | TF   | Description                                                                                               | MSU ID         | ktotal           | GO                                                                                                                                                                     | Mapman | KEGG                                                                      |
|--------------|-----------|------|-----------------------------------------------------------------------------------------------------------|----------------|------------------|------------------------------------------------------------------------------------------------------------------------------------------------------------------------|--------|---------------------------------------------------------------------------|
| Os01g0121500 |           |      | Conserved hypothetical protein.                                                                           | LOC_Os01g03130 | 21.6288395773726 |                                                                                                                                                                        |        | [not assigned.unknown]                                                    |
| Os01g0159300 |           |      | Zinc finger, RING/FYVE/PHD-type domain containing protein.                                                | LOC_Os01g06590 | 47.3377961398288 | Molecular Function: protein binding (GO:0005515), Molecular Function: zinc ion binding (GO:0008270)                                                                    |        | [protein.degradation.ubiquitin.E3.RING]                                   |
| Os01g0199400 |           |      | Alpha/beta hydrolase family protein., Similar to predicted protein.                                       | LOC_Os01g10250 | 18.3826950562483 |                                                                                                                                                                        |        | [lipid metabolism.lipid degradation.lipases]                              |
| Os01g0246700 | OsWRKY1v2 | WRKY | Similar to WRKY transcription factor 1.                                                                   | LOC_Os01g14440 | 21.2736183178468 |                                                                                                                                                                        |        | [RNA.regulation of transcription.WRKY domain transcription factor family] |
| Os01g0261200 | OsNTL3    | NAC  | No apical meristem (NAM) protein domain containing protein., Similar to NAC domain-containing protein 74. | LOC_Os01g15640 | 27.7648723945485 | Biological Process: regulation of transcription, DNA-dependent (GO:0006355), Molecular Function: DNA binding (GO:0003677),                                             |        | [development.unspecified]                                                 |
| Os01g0618000 |           |      | Exonuclease domain containing protein.                                                                    | LOC_Os01g43080 | 22.4643420419164 | Cellular Component: intracellular (GO:0005622), Molecular Function: nucleic acid binding (GO:0003676), Molecular Function: exonuclease activity (GO:0004527)           |        | [not assigned.unknown]                                                    |
| Os01g0623500 |           |      | ATPase, AAA-type, core domain containing protein.                                                         | LOC_Os01g43480 | 23.8299483259502 | Molecular Function: nucleotide binding (GO:0000166), Molecular Function: ATP binding (GO:0005524), Molecular Function: nucleoside-triphosphatase activity (GO:0017111) |        | [protein.degradation.AAA type]                                            |
| Os01g0672400 | OsDi19-3  |      | Drought induced 19 family protein., Similar to Protein DEHYDRATION-INDUCED 19 homolog 3.                  | LOC_Os01g48190 | 25.8674371361883 |                                                                                                                                                                        |        | [stress.abiotic.drought/salt]                                             |
| Os01g0708900 |           |      | Mitochondrial substrate carrier family protein.                                                           | LOC_Os01g51250 | 49.3267572959795 | Biological Process: transport (GO:0006810), Biological Process: transmembrane transport (GO:0055085), Cellular Component: mitochondrial inner                          |        | [transport.metabolite transporters at the mitochondrial membrane]         |

| Gene ID      | Name | TF | Description                                                              | MSU ID         | ktotal           | GO                                                                                                                                                                                                                                                                                                                                                        | Mapman                                   | KEGG                                                                                                                                                                              |
|--------------|------|----|--------------------------------------------------------------------------|----------------|------------------|-----------------------------------------------------------------------------------------------------------------------------------------------------------------------------------------------------------------------------------------------------------------------------------------------------------------------------------------------------------|------------------------------------------|-----------------------------------------------------------------------------------------------------------------------------------------------------------------------------------|
| Os01g0709400 |      |    | Survival protein SurE family protein.                                    | LOC_Os01g51280 | 24.0210929097547 | membrane (GO:0005743),<br>Molecular Function: binding (GO:0005488)<br><br>Molecular Function: hydrolase activity (GO:0016787)                                                                                                                                                                                                                             | [misc.acid and other phosphatases']      | Purine metabolism,<br>Pyrimidine metabolism,<br>Nicotinate and nicotinamide metabolism,<br>Metabolic pathways,<br>Biosynthesis of secondary metabolites,<br>Nucleotide metabolism |
| Os01g0747400 |      |    | Protein kinase, core domain containing protein.                          | LOC_Os01g54350 | 37.472111695015  | Biological Process: protein phosphorylation (GO:0006468),<br>Molecular Function: protein kinase activity (GO:0004672),<br>Molecular Function: protein serine/threonine kinase activity (GO:0004674),<br>Molecular Function: ATP binding (GO:0005524),<br>Molecular Function: transferase activity, transferring phosphorus-containing groups (GO:0016772) | [protein.postranslational modification'] |                                                                                                                                                                                   |
| Os01g0748900 |      |    | Membrane attack complex component/perforin/complement C9 family protein. | LOC_Os01g54510 | 21.4547277200377 |                                                                                                                                                                                                                                                                                                                                                           | [cell.cell death.plants']                |                                                                                                                                                                                   |
| Os01g0793800 |      |    | Conserved hypothetical protein.                                          | LOC_Os01g58130 | 17.254642112296  |                                                                                                                                                                                                                                                                                                                                                           | [not assigned.unknown']                  |                                                                                                                                                                                   |
| Os01g0795600 |      |    | Conserved hypothetical protein.                                          | LOC_Os01g58310 | 17.8531671614703 |                                                                                                                                                                                                                                                                                                                                                           | [not assigned.unknown']                  |                                                                                                                                                                                   |
| Os01g0819000 |      |    | Similar to transposon protein CACTA, En/Spm sub-class.                   | LOC_Os01g60309 | 20.4217028511527 |                                                                                                                                                                                                                                                                                                                                                           | [not assigned.unknown']                  |                                                                                                                                                                                   |
| Os01g0845000 |      |    | Hypothetical conserved gene.                                             | None           | 25.9920660656859 |                                                                                                                                                                                                                                                                                                                                                           |                                          |                                                                                                                                                                                   |

| Gene ID      | Name                                                                              | TF   | Description                                                                 | MSU ID         | ktotal           | GO                                                                                                                                                                                                                                                           | Mapman                                                                                                                                                     | KEGG                               |
|--------------|-----------------------------------------------------------------------------------|------|-----------------------------------------------------------------------------|----------------|------------------|--------------------------------------------------------------------------------------------------------------------------------------------------------------------------------------------------------------------------------------------------------------|------------------------------------------------------------------------------------------------------------------------------------------------------------|------------------------------------|
| Os01g0846400 |                                                                                   |      | Conserved hypothetical protein.                                             | LOC_Os01g62770 | 23.3908307132832 |                                                                                                                                                                                                                                                              |                                                                                                                                                            | [not assigned.unknown]             |
| Os01g0850100 |                                                                                   |      | Similar to Phosphatidic acid phosphatase-like protein.                      | LOC_Os01g63060 | 40.4312422157724 |                                                                                                                                                                                                                                                              |                                                                                                                                                            | [misc.acid and other phosphatases] |
| Os01g0859100 | ZOS1-17                                                                           | C2H2 | Similar to WIP1 protein (Fragment).                                         | LOC_Os01g63980 | 22.2845712918944 | Cellular Component: intracellular (GO:0005622), Molecular Function: nucleic acid binding (GO:0003676), Molecular Function: zinc ion binding (GO:0008270)                                                                                                     | [RNA.regulation of transcription.C2H2 zinc finger family]                                                                                                  |                                    |
| Os01g0860800 |                                                                                   |      | Glycoside hydrolase, family 17 protein.                                     | LOC_Os01g64170 | 31.906767961977  | Biological Process: carbohydrate metabolic process (GO:0005975), Molecular Function: catalytic activity (GO:0003824), Molecular Function: hydrolase activity, hydrolyzing O-glycosyl compounds (GO:0004553), Molecular Function: cation binding (GO:0043169) | [misc.beta 1,3 glucan hydrolases.glucan endo-1,3-beta-glucosidase]                                                                                         |                                    |
| Os01g0868000 | ERF99, OsEREBP2, EREBP2, OsERF#099, OsERF099, OsERF99, AP2/EREBP#080, AP2/EREBP80 | ERF  | AP2/ERF transcription factor, Abiotic stress response, Salt stress response | LOC_Os01g64790 | 29.8351066628416 | Biological Process: regulation of transcription, DNA-templated (GO:0006355), Molecular Function: DNA binding (GO:0003677), Molecular Function: transcription factor activity, sequence-specific DNA binding (GO:0003700)                                     | [hormone metabolism.ethylene.signal transduction, 'RNA.regulation of transcription.AP2/EREBP, APETALA2/Ethylene-responsive element binding protein family] |                                    |
| Os01g0884300 | OsNAC6                                                                            | NAC  | No apical meristem (NAM) protein domain containing protein.                 | LOC_Os01g66120 | 18.0405147235402 | Biological Process: regulation of transcription, DNA-dependent (GO:0006355), Molecular Function: DNA binding (GO:0003677)                                                                                                                                    | [development.unspecified]                                                                                                                                  |                                    |
| Os01g0908700 |                                                                                   |      | Similar to Hnrpa2b1-prov protein.                                           | LOC_Os01g68060 | 52.1910824257723 | Molecular Function: protein binding (GO:0005515), Molecular Function: zinc ion binding (GO:0008270)                                                                                                                                                          | [protein.degradation.ubiquitin.E3.RING]                                                                                                                    |                                    |
| Os01g0919500 |                                                                                   |      | Zinc finger, RING/FYVE/PHD-type domain containing protein., Hypothetical    | LOC_Os01g69040 | 35.8500277387632 | Molecular Function: protein binding (GO:0005515), Molecular Function: zinc ion                                                                                                                                                                               |                                                                                                                                                            | [not assigned.unknown]             |

| Gene ID      | Name      | TF       | Description                                                                                                                   | MSU ID         | ktotal           | GO                                                                                                                                                                                                                                                                                                                                                                                          | Mapman                                                                                | KEGG                       |
|--------------|-----------|----------|-------------------------------------------------------------------------------------------------------------------------------|----------------|------------------|---------------------------------------------------------------------------------------------------------------------------------------------------------------------------------------------------------------------------------------------------------------------------------------------------------------------------------------------------------------------------------------------|---------------------------------------------------------------------------------------|----------------------------|
| Os01g0956075 |           |          | conserved gene.                                                                                                               | LOC_Os01g72600 | 19.2788642449716 | binding (GO:0008270),                                                                                                                                                                                                                                                                                                                                                                       | [not assigned.unknown]                                                                |                            |
|              |           |          | Armadillo-like helical domain containing protein.                                                                             |                |                  | Molecular Function: binding (GO:0005488), Molecular Function: protein binding (GO:0005515)                                                                                                                                                                                                                                                                                                  |                                                                                       |                            |
| Os02g0146500 | OsCDS1    |          | Conserved hypothetical protein., Similar to cDNA clone:J013125B21, full insert sequence.                                      | LOC_Os02g05320 | 15.8810293181607 |                                                                                                                                                                                                                                                                                                                                                                                             | [not assigned.unknown]                                                                |                            |
| Os02g0147800 |           | HB-other | Hypothetical conserved gene., Similar to Homeo protein (Fragment).                                                            | LOC_Os02g05450 | 19.7022212730497 | Molecular Function: protein binding (GO:0005515), Biological Process: regulation of transcription, DNA-dependent (GO:0006355), Molecular Function: DNA binding (GO:0003677), Molecular Function: sequence-specific DNA binding transcription factor activity (GO:0003700), Molecular Function: protein binding (GO:0005515), Molecular Function: sequence-specific DNA binding (GO:0043565) | [RNA.regulation of transcription.HB,Homeobox transcription factor family]             |                            |
| Os02g0290300 | OsWD40-40 |          | WD40/YVTN repeat-like domain containing protein.                                                                              | LOC_Os02g18820 | 13.985030546798  | Molecular Function: protein binding (GO:0005515)                                                                                                                                                                                                                                                                                                                                            | [development.unspecified]                                                             |                            |
| Os02g0300700 | OseIF1A-1 |          | Similar to Eukaryotic translation initiation factor 1A (EIF-1A) (EIF-4C).                                                     | LOC_Os02g19770 | 13.2410731555625 | Biological Process: translational initiation (GO:0006413), Molecular Function: RNA binding (GO:0003723), Molecular Function: translation initiation factor activity (GO:0003743)                                                                                                                                                                                                            | [protein.synthesis.initiation]                                                        |                            |
| Os02g0475300 |           |          | Membrane attack complex component/perforin/complement C9 family protein., Similar to MAC/ Perforin domain containing protein. | LOC_Os02g27480 | 23.1841954348763 |                                                                                                                                                                                                                                                                                                                                                                                             | [cell.cell death.plants]                                                              |                            |
| Os02g0513000 | OsPBL1    |          | Similar to Receptor protein kinase-like protein.                                                                              | LOC_Os02g30900 | 30.1732553382627 | Biological Process: protein phosphorylation (GO:0006468), Molecular Function: protein                                                                                                                                                                                                                                                                                                       | [protein.postranslational modification.kinase.receptor like cytoplasmatic kinase VII] | Plant-pathogen interaction |

| Gene ID      | Name                                          | TF | Description                                                                                                               | MSU ID         | ktotal           | GO                                                                                                                                                                                                                                                                               | Mapman                                                                             | KEGG                                               |
|--------------|-----------------------------------------------|----|---------------------------------------------------------------------------------------------------------------------------|----------------|------------------|----------------------------------------------------------------------------------------------------------------------------------------------------------------------------------------------------------------------------------------------------------------------------------|------------------------------------------------------------------------------------|----------------------------------------------------|
|              |                                               |    |                                                                                                                           |                |                  | kinase activity (GO:0004672),<br>Molecular Function: protein<br>serine/threonine kinase activity<br>(GO:0004674), Molecular<br>Function: ATP binding<br>(GO:0005524), Molecular<br>Function: transferase activity,<br>transferring phosphorus-<br>containing groups (GO:0016772) |                                                                                    |                                                    |
| Os02g0539200 | OsPUB33                                       |    | Zinc finger, RING/FYVE/PHD-<br>type domain containing<br>protein.                                                         | LOC_Os02g33590 | 26.0242856815913 | Biological Process: protein<br>ubiquitination (GO:0016567),<br>Cellular Component: ubiquitin<br>ligase complex (GO:0000151),<br>Molecular Function: ubiquitin-<br>protein ligase activity<br>(GO:0004842), Molecular<br>Function: binding (GO:0005488)                           | ['RNA.regulation of transcription.PHOR1']                                          |                                                    |
| Os02g0790500 |                                               |    | Hypothetical protein., Similar<br>to Trehalose-6-phosphate<br>synthase., Similar to<br>trehalose-6-phosphate<br>synthase. | LOC_Os02g54820 | 16.0584044437305 | , Biological Process: trehalose<br>biosynthetic process<br>(GO:0005992), Molecular<br>Function: catalytic activity<br>(GO:0003824)                                                                                                                                               | ['minor CHO<br>metabolism.trehalose.potential TPS/TPP']                            |                                                    |
| Os02g0819400 | LPA1,<br>OsLpa1.3,<br>Oslpa1, Lpa1,<br>OsLpa1 |    | Phytic acid metabolism                                                                                                    | LOC_Os02g57400 | 18.2441893849221 |                                                                                                                                                                                                                                                                                  | ['not assigned.unknown']                                                           |                                                    |
| Os03g0124300 |                                               |    | Similar to ATP binding<br>protein.                                                                                        | LOC_Os03g03290 | 26.9309499653932 |                                                                                                                                                                                                                                                                                  | ['signalling.receptor kinases.Catharanthus<br>roseus-like RLK1']                   |                                                    |
| Os03g0165050 |                                               |    | Hypothetical genes.                                                                                                       | None           | 20.5357802120153 |                                                                                                                                                                                                                                                                                  |                                                                                    |                                                    |
| Os03g0186800 |                                               |    | Modifier of rudimentary,<br>Modr family protein.                                                                          | LOC_Os03g08770 | 26.5111362518325 |                                                                                                                                                                                                                                                                                  | ['not assigned.unknown']                                                           | Endocytosis                                        |
| Os03g0187600 | OsGRAM                                        |    | GRAM domain containing<br>protein.                                                                                        | LOC_Os03g08860 | 20.9918843053889 |                                                                                                                                                                                                                                                                                  | ['hormone metabolism.abscisic<br>acid.induced-regulated-responsive-<br>activated'] |                                                    |
| Os03g0187700 |                                               |    | Target SNARE coiled-coil<br>region domain containing<br>protein.                                                          | LOC_Os03g08870 | 18.9247721286199 | Molecular Function: protein<br>binding (GO:0005515)                                                                                                                                                                                                                              | ['not assigned.unknown']                                                           | SNARE<br>interactions in<br>vesicular<br>transport |
| Os03g0194900 |                                               |    | Uncharacterised conserved<br>protein UCP037471 domain                                                                     | LOC_Os03g09900 | 20.6487252432152 | Cellular Component: integral to<br>membrane (GO:0016021),                                                                                                                                                                                                                        | ['hormone metabolism.auxin.induced-<br>regulated-responsive-activated']            |                                                    |

| Gene ID      | Name                                           | TF    | Description                                                                      | MSU ID         | ktotal           | GO                                                                                                                                                                                                                                                                                                                                                                                                                                                                                                                             | Mapman                                                                         | KEGG                              |
|--------------|------------------------------------------------|-------|----------------------------------------------------------------------------------|----------------|------------------|--------------------------------------------------------------------------------------------------------------------------------------------------------------------------------------------------------------------------------------------------------------------------------------------------------------------------------------------------------------------------------------------------------------------------------------------------------------------------------------------------------------------------------|--------------------------------------------------------------------------------|-----------------------------------|
|              |                                                |       | containing protein., Similar to membrane protein.                                |                |                  |                                                                                                                                                                                                                                                                                                                                                                                                                                                                                                                                |                                                                                |                                   |
| Os03g0224200 | ORR1, ORR1, Orr1, OsRR21, Rrb1, OsRR19, OsRRB1 | ARR-B | B-type response regulator, Cytokinin signaling, Similar to response regulator 8. | LOC_Os03g12350 | 41.6216743277943 | Biological Process: two-component signal transduction system (phosphorelay) (GO:0000160), Biological Process: regulation of transcription, DNA-dependent (GO:0006355), Molecular Function: two-component response regulator activity (GO:0000156), Molecular Function: DNA binding (GO:0003677), Molecular Function: protein binding (GO:0005515), Biological Process: regulation of transcription, DNA-dependent (GO:0006355), Molecular Function: DNA binding (GO:0003677), Molecular Function: protein binding (GO:0005515) | ['RNA.regulation of transcription.ARR']                                        | Plant hormone signal transduction |
| Os03g0224700 | HSFA9                                          | HSF   | Similar to HSP protein (Fragment).                                               | LOC_Os03g12370 | 24.1458231620391 | Biological Process: regulation of transcription, DNA-dependent (GO:0006355), Cellular Component: nucleus (GO:0005634), Molecular Function: sequence-specific DNA binding transcription factor activity (GO:0003700), Molecular Function: sequence-specific DNA binding (GO:0043565)                                                                                                                                                                                                                                            | ['RNA.regulation of transcription.HSF,Heat-shock transcription factor family'] |                                   |
| Os03g0264150 |                                                |       | Hypothetical gene.                                                               | None           | 28.6180140154774 |                                                                                                                                                                                                                                                                                                                                                                                                                                                                                                                                |                                                                                |                                   |
| Os03g0274000 |                                                |       | Oxysterol-binding protein family protein., Similar to oxysterol-binding protein. | LOC_Os03g16690 | 39.8531681725476 |                                                                                                                                                                                                                                                                                                                                                                                                                                                                                                                                | ['cell.vesicle transport']                                                     |                                   |
| Os03g0331700 | CML27                                          |       | Similar to cDNA clone:002-120-A09, full insert sequence.                         | LOC_Os03g21380 | 21.0923586236831 |                                                                                                                                                                                                                                                                                                                                                                                                                                                                                                                                | ['signalling.calcium']                                                         | Plant-pathogen interaction        |
| Os03g0334200 |                                                |       | Protein of unknown function                                                      | LOC_Os03g21640 | 17.0409954893373 |                                                                                                                                                                                                                                                                                                                                                                                                                                                                                                                                | ['not assigned.unknown']                                                       |                                   |

| Gene ID      | Name                  | TF       | Description                                                                                                   | MSU ID         | ktotal           | GO                                                                                                                                                                                                                                                                             | Mapman                                                                                 | KEGG                                      |
|--------------|-----------------------|----------|---------------------------------------------------------------------------------------------------------------|----------------|------------------|--------------------------------------------------------------------------------------------------------------------------------------------------------------------------------------------------------------------------------------------------------------------------------|----------------------------------------------------------------------------------------|-------------------------------------------|
|              |                       |          | DUF3133 domain containing protein.                                                                            |                |                  |                                                                                                                                                                                                                                                                                |                                                                                        |                                           |
| Os03g0655200 |                       |          | Similar to Membrin 11 (AtMEMB11) (Golgi SNAP receptor complex member 2-1) (27 kDa Golgi SNARE protein).       | LOC_Os03g45260 | 20.4824005674662 |                                                                                                                                                                                                                                                                                | ['cell.vesicle transport']                                                             | SNARE interactions in vesicular transport |
| Os03g0693000 |                       |          | Similar to predicted protein.                                                                                 | LOC_Os03g48660 | 45.0175644450123 |                                                                                                                                                                                                                                                                                | ['not assigned.unknown']                                                               |                                           |
| Os03g0740833 |                       |          | Conserved hypothetical protein.                                                                               | None           | 20.9741739123653 |                                                                                                                                                                                                                                                                                |                                                                                        |                                           |
| Os03g0761100 | OsBIPP2C2, OsBIPP2C2b |          | Protein phosphatase 2C-like protein., Similar to protein phosphatase 2C family protein / PP2C family protein. | LOC_Os03g55320 | 17.5638349395865 | Biological Process: protein dephosphorylation (GO:0006470), Cellular Component: protein serine/threonine phosphatase complex (GO:0008287), Molecular Function: catalytic activity (GO:0003824), Molecular Function: protein serine/threonine phosphatase activity (GO:0004722) | ['protein.postranslational modification']                                              |                                           |
| Os03g0820300 | ZFP182                | C2H2     | TFIIIA-type zinc finger protein, Transcription activator, Abiotic stress tolerance                            | LOC_Os03g60560 | 20.0219983485984 | Molecular Function: metal ion binding (GO:0046872)                                                                                                                                                                                                                             | ['not assigned.unknown']                                                               |                                           |
| Os04g0402300 |                       |          | Similar to Cysteine-type peptidase.                                                                           | LOC_Os04g32970 | 27.3633581153058 |                                                                                                                                                                                                                                                                                | ['protein.degradation.cysteine protease']                                              |                                           |
| Os04g0600000 |                       |          | Similar to Transfactor-like protein.                                                                          | LOC_Os04g51130 | 22.406524472977  | Biological Process: regulation of transcription, DNA-dependent (GO:0006355), Molecular Function: DNA binding (GO:0003677), Molecular Function: protein binding (GO:0005515)                                                                                                    | ['not assigned.unknown']                                                               |                                           |
| Os04g0602300 |                       | Trihelix | Similar to B0403H10-OSIGBa0105A11.17 protein.                                                                 | LOC_Os04g51320 | 37.0827082195673 |                                                                                                                                                                                                                                                                                | ['RNA.regulation of transcription.Trihelix, Triple-Helix transcription factor family'] |                                           |
| Os04g0609600 | OsPP2C44              |          | Similar to Protein phosphatase type 2C.                                                                       | LOC_Os04g52000 | 56.4225662563757 | Molecular Function: catalytic activity (GO:0003824)                                                                                                                                                                                                                            | ['protein.postranslational modification']                                              |                                           |
| Os04g0660900 | NPF2.6                |          | TGF-beta receptor, type I/II extracellular region family                                                      | LOC_Os04g56560 | 29.0551965144995 | Biological Process: oligopeptide transport (GO:0006857), Cellular                                                                                                                                                                                                              | ['transport.peptides and oligopeptides']                                               |                                           |

| Gene ID      | Name    | TF | Description                                                                  | MSU ID         | ktotal           | GO                                                                                                                                                                                                                                                                                                                                                                                                                                                                                                                                                                                                 | Mapman | KEGG                                |
|--------------|---------|----|------------------------------------------------------------------------------|----------------|------------------|----------------------------------------------------------------------------------------------------------------------------------------------------------------------------------------------------------------------------------------------------------------------------------------------------------------------------------------------------------------------------------------------------------------------------------------------------------------------------------------------------------------------------------------------------------------------------------------------------|--------|-------------------------------------|
|              |         |    | protein.                                                                     |                |                  | Component: membrane (GO:0016020), Molecular Function: transporter activity (GO:0005215)                                                                                                                                                                                                                                                                                                                                                                                                                                                                                                            |        |                                     |
| Os04g0672900 |         |    | Similar to H0322F07.6 protein.                                               | LOC_Os04g57690 | 30.5067817445764 |                                                                                                                                                                                                                                                                                                                                                                                                                                                                                                                                                                                                    |        | [not assigned.unknown']             |
| Os05g0119200 | OsGPRP3 |    | Similar to EST C27893 corresponds to a region of the predicated gene.        | LOC_Os05g02770 | 33.1263619900303 |                                                                                                                                                                                                                                                                                                                                                                                                                                                                                                                                                                                                    |        | [not assigned.unknown']             |
| Os05g0119300 |         |    | Similar to ESTs AA754121.                                                    | LOC_Os05g02780 | 26.5813497233661 |                                                                                                                                                                                                                                                                                                                                                                                                                                                                                                                                                                                                    |        | [not assigned.unknown']             |
| Os05g0169000 | TRXH8   |    | Similar to Thioredoxin-like protein., Similar to Thioredoxin h-like protein. | LOC_Os05g07690 | 20.129746245603  | Biological Process: glycerol ether metabolic process (GO:0006662), Biological Process: cell redox homeostasis (GO:0045454), Molecular Function: electron carrier activity (GO:0009055), Molecular Function: protein disulfide oxidoreductase activity (GO:0015035),                                                                                                                                                                                                                                                                                                                                |        | [redox.thioredoxin']                |
| Os05g0305900 | OsSTLK  |    | Protein kinase, core domain containing protein.                              | LOC_Os05g24010 | 54.0334126599503 | Biological Process: protein phosphorylation (GO:0006468), Molecular Function: protein kinase activity (GO:0004672), Molecular Function: protein serine/threonine kinase activity (GO:0004674), Molecular Function: protein tyrosine kinase activity (GO:0004713), Molecular Function: ATP binding (GO:0005524), Molecular Function: transferase activity, transferring phosphorus-containing groups (GO:0016772), Biological Process: protein phosphorylation (GO:0006468), Molecular Function: protein kinase activity (GO:0004672), Molecular Function: protein serine/threonine kinase activity |        | [signalling.receptor kinases.misc'] |



| Gene ID      | Name    | TF   | Description                                                                                                  | MSU ID         | ktotal           | GO                                                                                                                                                                     | Mapman                                                                                                     | KEGG                       |
|--------------|---------|------|--------------------------------------------------------------------------------------------------------------|----------------|------------------|------------------------------------------------------------------------------------------------------------------------------------------------------------------------|------------------------------------------------------------------------------------------------------------|----------------------------|
|              |         |      |                                                                                                              |                |                  | (GO:0004674), Molecular Function: ATP binding (GO:0005524), Molecular Function: transferase activity, transferring phosphorus-containing groups (GO:0016772)           |                                                                                                            |                            |
| Os05g0312600 | CML21   |      | EF-Hand type domain containing protein.                                                                      | LOC_Os05g24780 | 34.2440794097188 | Molecular Function: calcium ion binding (GO:0005509)                                                                                                                   | [signalling.calcium']                                                                                      | Plant-pathogen interaction |
| Os05g0381700 |         |      | Calmodulin-binding protein, plant domain containing protein., Similar to calmodulin-binding protein-related. | LOC_Os05g31690 | 49.2886801136929 |                                                                                                                                                                        | [signalling.calcium']                                                                                      |                            |
| Os05g0474900 |         |      | Protein of unknown function Cys-rich family protein.                                                         | LOC_Os05g39730 | 25.4198454554649 |                                                                                                                                                                        | [stress']                                                                                                  |                            |
| Os05g0529000 | OsCOLE1 |      | Tonoplast-localized DUF502-containing protein, COV-like protein, Regulation of intracellular auxin transport | LOC_Os05g45280 | 26.5905166897334 |                                                                                                                                                                        | [hormone metabolism.auxin.induced-regulated-responsive-activated']                                         |                            |
| Os05g0588900 |         |      | Similar to mitochondrial chaperone BCS1.                                                                     | LOC_Os05g51130 | 19.2378847020553 | Molecular Function: nucleotide binding (GO:0000166), Molecular Function: ATP binding (GO:0005524), Molecular Function: nucleoside-triphosphatase activity (GO:0017111) | [protein.degradation.AAA type']                                                                            |                            |
| Os06g0126000 |         |      | LIM binding protein domain containing protein., Hypothetical conserved gene.                                 | LOC_Os06g03600 | 26.8885264188022 | Cellular Component: nucleus (GO:0005634), Molecular Function: transcription cofactor activity (GO:0003712)                                                             | [RNA.regulation of transcription.C2H2 zinc finger family', 'RNA.regulation of transcription.unclassified'] |                            |
| Os06g0147300 |         |      | Similar to cDNA clone:J023088C01, full insert sequence.                                                      | LOC_Os06g05470 | 26.6873008878271 |                                                                                                                                                                        | [not assigned.unknown']                                                                                    |                            |
| Os06g0193400 | OsPTF1  | bHLH | Similar to Helix-loop-helix protein homolog., Similar to BHLH transcription factor.                          | LOC_Os06g09370 | 26.187359995159  |                                                                                                                                                                        | [RNA.regulation of transcription.bHLH,Basic Helix-Loop-Helix family']                                      |                            |
| Os06g0200600 |         |      | Non-protein coding transcript.                                                                               | LOC_Os06g09990 | 14.4118851225382 |                                                                                                                                                                        | [not assigned.unknown']                                                                                    |                            |
| Os06g0695600 | OsMAR1  |      | RING E3 ligase, Negative regulator for salt-stress                                                           | LOC_Os06g48040 | 38.7905146611839 |                                                                                                                                                                        | [protein.degradation.ubiquitin.E3.RING']                                                                   |                            |

| Gene ID      | Name   | TF  | Description                                                                                                                                                                                                                                                                                                                                               | MSU ID         | ktotal           | GO                                                                                                                                                                          | Mapman                                                                     | KEGG |
|--------------|--------|-----|-----------------------------------------------------------------------------------------------------------------------------------------------------------------------------------------------------------------------------------------------------------------------------------------------------------------------------------------------------------|----------------|------------------|-----------------------------------------------------------------------------------------------------------------------------------------------------------------------------|----------------------------------------------------------------------------|------|
|              |        |     | response                                                                                                                                                                                                                                                                                                                                                  |                |                  |                                                                                                                                                                             |                                                                            |      |
| Os07g0168800 | ZFP177 |     | Zinc finger, AN1-type domain containing protein.                                                                                                                                                                                                                                                                                                          | LOC_Os07g07350 | 37.6117279721818 | Molecular Function: DNA binding (GO:0003677), Molecular Function: zinc ion binding (GO:0008270)                                                                             | ['RNA.regulation of transcription.unclassified']                           |      |
| Os07g0479600 |        |     | Conserved hypothetical protein.                                                                                                                                                                                                                                                                                                                           | LOC_Os07g29640 | 29.2316297190471 |                                                                                                                                                                             | ['not assigned.unknown']                                                   |      |
| Os07g0573300 |        |     | FYVE finger-containing phosphoinositide kinase (EC 2.7.1.68) (1-phosphatidylinositol-4-phosphate 5-kinase) (PIP5K) (PtdIns(4)P-5- kinase) (PIKfyve) (p235). Splice isoform p235S., Similar to FYVE finger-containing phosphoinositide kinase (EC 2.7.1.68) (1-phosphatidylinositol-4-phosphate 5-kinase) (PIP5K) (PtdIns(4)P-5- kinase) (PIKfyve) (p235). | LOC_Os07g38580 | 56.7727262598883 | Molecular Function: metal ion binding (GO:0046872)                                                                                                                          | ['RNA.regulation of transcription.unclassified']                           |      |
| Os07g0688200 |        | MYB | Similar to Typical P-type R2R3 Myb protein (Fragment).                                                                                                                                                                                                                                                                                                    | LOC_Os07g48870 | 48.8057285280857 | Biological Process: regulation of transcription, DNA-dependent (GO:0006355), Molecular Function: DNA binding (GO:0003677), Molecular Function: protein binding (GO:0005515) | ['RNA.regulation of transcription.MYB domain transcription factor family'] |      |
| Os08g0107400 |        |     | Similar to GDP-mannose transporter., Similar to predicted protein.                                                                                                                                                                                                                                                                                        | LOC_Os08g01610 | 19.8608266189593 |                                                                                                                                                                             | ['transport.sugars', 'transport.NDP-sugars at the ER']                     |      |
| Os08g0110300 |        |     | Longin domain containing protein.                                                                                                                                                                                                                                                                                                                         | LOC_Os08g01880 | 17.154842883975  | Biological Process: transport (GO:0006810), Biological Process: vesicle-mediated transport (GO:0016192), Cellular Component: integral to membrane (GO:0016021)              | ['cell.vesicle transport']                                                 |      |
| Os08g0128300 |        |     | Similar to Actin-like protein 3 (Actin-related protein 3).                                                                                                                                                                                                                                                                                                | LOC_Os08g03440 | 36.2264061068327 | Biological Process: regulation of actin filament polymerization (GO:0030833), Cellular                                                                                      | ['cell.organisation']                                                      |      |

| Gene ID      | Name                     | TF  | Description                                                                                                               | MSU ID         | ktotal           | GO                                                                                                                                                                                                                                                                                                                                                                                                                                                                                                                                                                                                                                                | Mapman                                                               | KEGG           |
|--------------|--------------------------|-----|---------------------------------------------------------------------------------------------------------------------------|----------------|------------------|---------------------------------------------------------------------------------------------------------------------------------------------------------------------------------------------------------------------------------------------------------------------------------------------------------------------------------------------------------------------------------------------------------------------------------------------------------------------------------------------------------------------------------------------------------------------------------------------------------------------------------------------------|----------------------------------------------------------------------|----------------|
|              |                          |     |                                                                                                                           |                |                  | Component: cytoskeleton (GO:0005856), Molecular Function: actin binding (GO:0003779), Molecular Function: ATP binding (GO:0005524)                                                                                                                                                                                                                                                                                                                                                                                                                                                                                                                |                                                                      |                |
| Os08g0157900 | OsNTL2                   | NAC | Similar to NAM protein.                                                                                                   | LOC_Os08g06140 | 18.280722778635  | Biological Process: regulation of transcription, DNA-dependent (GO:0006355), Molecular Function: DNA binding (GO:0003677)                                                                                                                                                                                                                                                                                                                                                                                                                                                                                                                         | ['development.unspecified']                                          |                |
| Os08g0408200 | SRWD4, SRWD4, OsWD40-160 |     | WD40 subfamily protein, Salt stress                                                                                       | LOC_Os08g31560 | 41.8299137042077 | Molecular Function: protein binding (GO:0005515)                                                                                                                                                                                                                                                                                                                                                                                                                                                                                                                                                                                                  | ['development.unspecified']                                          |                |
| Os08g0480100 |                          |     | Signal recognition particle receptor, alpha subunit, N-terminal domain containing protein., Similar to predicted protein. | LOC_Os08g37444 | 35.1494272764869 | Biological Process: GTP catabolic process (GO:0006184), Biological Process: SRP-dependent cotranslational protein targeting to membrane (GO:0006614), Biological Process: transport (GO:0006810), Biological Process: intracellular protein transport (GO:0006886), Cellular Component: signal recognition particle receptor complex (GO:0005785), Molecular Function: nucleotide binding (GO:0000166), Molecular Function: GTPase activity (GO:0003924), Molecular Function: signal recognition particle binding (GO:0005047), Molecular Function: GTP binding (GO:0005525), Molecular Function: nucleoside-triphosphatase activity (GO:0017111) | ['protein.targeting.secretory pathway.unspecified']                  | Protein export |
| Os08g0512400 |                          |     | Protein of unknown function DUF296 domain containing protein., Similar to AT-hook protein 1.                              | LOC_Os08g40150 | 16.8940399577977 | Molecular Function: DNA binding (GO:0003677)                                                                                                                                                                                                                                                                                                                                                                                                                                                                                                                                                                                                      | ['RNA.regulation of transcription.putative transcription regulator'] |                |

| Gene ID      | Name    | TF | Description                                                                                                                                                           | MSU ID         | ktotal           | GO                                                                                                                                                                                                                                                                                                                                                                                                  | Mapman                                                                | KEGG                       |
|--------------|---------|----|-----------------------------------------------------------------------------------------------------------------------------------------------------------------------|----------------|------------------|-----------------------------------------------------------------------------------------------------------------------------------------------------------------------------------------------------------------------------------------------------------------------------------------------------------------------------------------------------------------------------------------------------|-----------------------------------------------------------------------|----------------------------|
| Os08g0540400 | OsCPK21 |    | Similar to Calcium-dependent protein kinase.                                                                                                                          | LOC_Os08g42750 | 20.0665201821505 | Biological Process: protein phosphorylation (GO:0006468), Molecular Function: protein kinase activity (GO:0004672), Molecular Function: protein serine/threonine kinase activity (GO:0004674), Molecular Function: calcium ion binding (GO:0005509), Molecular Function: ATP binding (GO:0005524), Molecular Function: transferase activity, transferring phosphorus-containing groups (GO:0016772) | [signalling.calcium]                                                  | Plant-pathogen interaction |
| Os10g0492800 |         |    | Similar to Ser/Thr protein phosphatase family.                                                                                                                        | LOC_Os10g35060 | 15.3280223131666 |                                                                                                                                                                                                                                                                                                                                                                                                     | [not assigned.unknown]                                                |                            |
| Os10g0500600 |         |    | Zinc finger, C2H2-like domain containing protein., Similar to predicted protein.                                                                                      | LOC_Os10g35710 | 40.2624607488339 | Cellular Component: intracellular (GO:0005622), Molecular Function: zinc ion binding (GO:0008270),                                                                                                                                                                                                                                                                                                  | [not assigned.unknown]                                                |                            |
| Os10g0516800 | OsLCBK1 |    | Long-chain base kinase, Regulation of disease resistance response and programmed cell death (PCD), Diacylglycerol kinase, catalytic region domain containing protein. | LOC_Os10g37280 | 38.1602214655354 | Molecular Function: kinase activity (GO:0016301), Biological Process: activation of protein kinase C activity by G-protein coupled receptor protein signaling pathway (GO:0007205), Molecular Function: diacylglycerol kinase activity (GO:0004143)                                                                                                                                                 | ["lipid metabolism."exotics" (steroids, squalene etc).sphingolipids"] |                            |
| Os10g0518800 |         |    | Serine/threonine protein kinase domain containing protein.                                                                                                            | LOC_Os10g37480 | 17.1046862720932 | Biological Process: protein phosphorylation (GO:0006468), Molecular Function: protein kinase activity (GO:0004672), Molecular Function: protein serine/threonine kinase activity (GO:0004674), Molecular Function: protein tyrosine kinase activity (GO:0004713), Molecular Function: ATP binding (GO:0005524), Molecular Function: transferase activity, transferring phosphorus-                  | [protein.postranslational modification]                               |                            |

| Gene ID      | Name     | TF  | Description                                                                                                                               | MSU ID         | ktotal           | GO                                                                                                                                                                                                                      | Mapman                                                                                                     | KEGG |
|--------------|----------|-----|-------------------------------------------------------------------------------------------------------------------------------------------|----------------|------------------|-------------------------------------------------------------------------------------------------------------------------------------------------------------------------------------------------------------------------|------------------------------------------------------------------------------------------------------------|------|
|              |          |     |                                                                                                                                           |                |                  | containing groups (GO:0016772)                                                                                                                                                                                          |                                                                                                            |      |
| Os10g0520100 |          |     | Cyclin-like F-box domain containing protein.                                                                                              | LOC_Os10g37570 | 21.4542544745964 |                                                                                                                                                                                                                         | [not assigned.unknown]                                                                                     |      |
| Os10g0542800 | OsBSK1-2 |     | Brassinosteroid-signaling kinase, A member of the receptor-like cytoplasmic kinase (RLCK)-XII sub group, Major regulator in rice immunity | LOC_Os10g39670 | 24.2297319469875 | Biological Process: protein phosphorylation (GO:0006468), Molecular Function: protein kinase activity (GO:0004672), Molecular Function: protein binding (GO:0005515), Molecular Function: ATP binding (GO:0005524)      | [protein.postranslational modification.kinase.receptor like cytoplasmatic kinase VII']                     |      |
| Os11g0114300 |          |     | Conserved hypothetical protein.                                                                                                           | LOC_Os11g02290 | 18.7727667901261 |                                                                                                                                                                                                                         | [not assigned.unknown]                                                                                     |      |
| Os11g0133700 |          |     | Similar to Glucosamine-fructose-6-phosphate aminotransferase, isomerizing family protein, expressed.                                      | LOC_Os11g03900 | 30.7920614817706 |                                                                                                                                                                                                                         | [minor CHO metabolism.others']                                                                             |      |
| Os11g0141400 |          |     | Similar to EF hand family protein, expressed.                                                                                             | LOC_Os11g04560 | 22.7578907946731 | Molecular Function: calcium ion binding (GO:0005509)                                                                                                                                                                    | [signalling.calcium']                                                                                      |      |
| Os11g0168500 | ERF118   | ERF | Hypothetical conserved gene.                                                                                                              | LOC_Os11g06770 | 24.9544795384736 | Biological Process: regulation of transcription, DNA-dependent (GO:0006355), Molecular Function: DNA binding (GO:0003677), Molecular Function: sequence-specific DNA binding transcription factor activity (GO:0003700) | [RNA.regulation of transcription.AP2/ EREBP, APETALA2/Ethylene-responsive element binding protein family'] |      |
| Os11g0664500 |          |     | Hypothetical conserved gene.                                                                                                              | LOC_Os11g44310 | 16.2911746039573 |                                                                                                                                                                                                                         | [signalling.calcium']                                                                                      |      |
| Os11g0703400 |          |     | Similar to BRI1-KD interacting protein 109.                                                                                               | LOC_Os11g47710 | 23.2682414510744 | Biological Process: protein transport (GO:0015031)                                                                                                                                                                      | [RNA.regulation of transcription.SNF7']                                                                    |      |
| Os12g0114000 |          |     | Conserved hypothetical protein.                                                                                                           | LOC_Os12g02240 | 16.4279081138233 |                                                                                                                                                                                                                         | [not assigned.unknown]                                                                                     |      |
| Os12g0131100 |          |     | Similar to Glucosamine--fructose-6-phosphate aminotransferase [isomerizing] (EC 2.6.1.16) (Hexosephosphate aminotransferase) (D-          | LOC_Os12g03720 | 39.0741143172027 | Biological Process: carbohydrate metabolic process (GO:0005975), Molecular Function: sugar binding (GO:0005529)                                                                                                         | Alanine, aspartate and glutamate metabolism, Amino sugar and nucleotide                                    |      |

| Gene ID      | Name         | TF | Description                                                                                                       | MSU ID         | ktotal           | GO                                                                                                                                                                                    | Mapman                         | KEGG                                                                                      |
|--------------|--------------|----|-------------------------------------------------------------------------------------------------------------------|----------------|------------------|---------------------------------------------------------------------------------------------------------------------------------------------------------------------------------------|--------------------------------|-------------------------------------------------------------------------------------------|
|              |              |    | fructose-6- phosphate<br>amidotransferase) (GFAT).                                                                |                |                  |                                                                                                                                                                                       |                                | sugar<br>metabolism,<br>Metabolic<br>pathways,<br>Biosynthesis of<br>nucleotide<br>sugars |
| Os12g0131150 |              |    | Similar to Glucosamine-<br>fructose-6-phosphate<br>aminotransferase,<br>isomerizing family protein,<br>expressed. | LOC_Os12g03720 | 30.2902018917927 |                                                                                                                                                                                       | [minor CHO metabolism.others'] |                                                                                           |
| Os12g0147800 | OsPSK5, PSK5 |    | Similar to Phytosulfokines 5<br>precursor (Secretory protein<br>SH27A).                                           | LOC_Os12g05260 | 26.8548473955721 | Biological Process: cell<br>proliferation (GO:0008283),<br>Cellular Component:<br>extracellular region<br>(GO:0005576), Molecular<br>Function: growth factor activity<br>(GO:0008083) | ['development.unspecified']    |                                                                                           |
| Os12g0639100 |              |    | Major facilitator superfamily<br>MFS_1 protein., Similar to<br>nodulin-like protein.                              | LOC_Os12g44180 | 32.1825426603919 | Biological Process:<br>transmembrane transport<br>(GO:0055085), Cellular<br>Component: integral to<br>membrane (GO:0016021)                                                           | ['development.unspecified']    |                                                                                           |
